# Supplementary material for: Association between Estrogen Receptor-αGene XbaI and PvuII Polymorphisms and Periodontitis Susceptibility: A Meta-Analysis
Source: Hindawi journal article supplement (doi:10.1155/2015/741972), 2015-01-01
Supplement: f1 [file 741972.f1.pdf]

**Supplementary table 1.**  
**Scale for quality assessment**

| Criteria                                                                                                                  | Score |
|---------------------------------------------------------------------------------------------------------------------------|-------|
| <b>Representativeness of cases</b>                                                                                        |       |
| Consecutive/randomly selected from case population with clearly defined sampling frame                                    | 2     |
| Consecutive/randomly selected from case population without clearly defined sampling frame or with extensive               | 1     |
| Not described                                                                                                             | 0     |
| <b>Source of controls</b>                                                                                                 |       |
| Healthy- or population-based                                                                                              | 2     |
| Hospital-bases                                                                                                            | 1     |
| Not described                                                                                                             | 0     |
| <b>Hardy-Weinberg equilibrium in controls</b>                                                                             |       |
| Hardy-Weinberg equilibrium                                                                                                | 2     |
| Hardy-Weinberg disequilibrium                                                                                             | 1     |
| <b>Genotyping examination</b>                                                                                             |       |
| Genotyping done under “blinded” condition                                                                                 | 1     |
| Unblinded done or not mentioned                                                                                           | 0     |
| <b>Association assessment</b>                                                                                             |       |
| Assess association between genotypes and periodontitis with appropriate statistics and adjustment for confounders         | 2     |
| Assess association between genotypes and periodontitis with appropriate statistics and without adjustment for confounders | 1     |
| Inappropriate statistics used                                                                                             | 0     |
| <b>Total sample size</b>                                                                                                  |       |
| ≥200                                                                                                                      | 2     |
| >100 but <200                                                                                                             | 1     |
| ≤100                                                                                                                      | 0     |
